# Supplementary material
Source: HighWire-hosted journal article supplement (https://hw-f5-jim.highwire.org/content/jim-2017-000473)
Supplement: inline-supplementary-material-1 [file inline-supplementary-material-1.pdf]

### Supplemental Figure 1.

Sequence of the human SerpinB3 (SCCA1) promoter. Promoter fragments were PCR-amplified and cloned into a luciferase indicator. Sequences corresponding to forward primers are highlighted in yellow, and to the common reverse primer in red. The reported transcription start sites are highlighted in blue and purple.

caatcaaatgaaagctttgaagtcactcagaataattgaagcagtttgaataaagagcggagatgtgatagattact  
tagtgaatatgaaggagcagcatagaagatggtaggaggtacatggtatacctgcatggccaacaaaattaaaata  
ggacattgaagacagagaaaaacgatggctagaaaagcagtaggaataaaagagaagatcatgcttcctggcttc  
atggtatgagaatggaggagtgagtagatacccatgagaaaagatcaaggggcatgcagccatcagggaaaatcc  
atagtgcagataaagcaaggaggaagaaggacagttctagtaaaagggagaacatcagtataggatgtttcttcgc  
aatagaaaaagaaggccaagaggaatcaggagagagattataagagaagactaaggggaccaggttagatttgg  
tttggtttgaaagcatacagtaaataatgatgtctgtccctgggtggttgggttagtaggaaggaggaaggaggca  
agagataatatcatttctgtgctactgtaattacatatacaggggaaattcagccagatatcaggtaaaattca  
cccctgatatttcacgtagggtcttttctattttccctaagtgtcggctggtctgagaaataaagggatagagtacaaa  
agagagaaattttaagctgggtgtctggggaagacatcacagtttggcaggttccatgataccccctgagccacaa  
aaccagcaagttttattagtattcaaaaggagagggtgtacgaatagagtgtgggtcacagagatcacgtgc  
ttcacaaggtgatagaatcacaaaggcaaatggaggcagggtgagatcacaggaccacaggacctgggtgaaat  
taaaattgctaataagtttcgggcacgcattgtcattgataacatcttatcaggagacagggttgagagcagaca  
accggtctgacaaaaatttattagatgggactttcctcatcctaataagcctaggagcgctacgggaggttggggct  
tatttcatccctacagcttcaaccataaaagacggctgcccccaaagcggccatttaaaaggcctaccctcaggggc  
atattctctttctcagggatgttccttgatgagaaaaagaattcagcgatatttctccatttgctttgaaagaagag  
aaatatggctctgtccaccagctcaccggcggtcagagtttaaggttatcactcatgttccctgaacattgctgttat  
cctgttctttttcaaggtgccagatttcatattgttcaaacacacatgctctacaataatattatgcagttaatgcaa  
tcatcacagggtcctgggaccacatacattctcctcagcttgc aaagatgatgggattaagagattaaagtaaagac  
aggcataggaaatcacaagggtattgattgaggaagtataagtggtcatgaaatcttcaaatattatgttcagaga  
ttgcagtaaagacaggcataagaaattataaaagtattaattggggaactaataaatgtccatgaaaacttcataa  
tctatgttctctgccatggctcagccagtcctcggttcagggtcctgacttctgcaacatacatgtgagactatt  
tcccgtctgcttttcaaacttactggagttgtttccctcatgaaaactaagaaaggaaagctagttaatcttattct  
gaggttgttcaatatatacatattcacatctgtagagagatccttgggaatacagtaattggcatatattctgttatttg  
atgcttgaaaaatctcttccactaacgatttccctatagataggcacaagcacataggtagaacaataaataaa  
tgttctcttaatttgtaactcacaatgctgagaaaactttacagccttcataaggaagtgaggtccagggaaaatcta  
ggagatatttgtaaccaacctataaagacattagtaatgcaggatatttctgaaagtgaatttccattgagga

tttgttttaatttctggattcctggatccaatgaagttggcataggtttatgaaatgccaagatacataagttggcaa  
gtgttcacatgcaaaaaacttcttgggaattcctgagctctctgtggcaatatatgacatcaggatatgtcccatctcgc  
acatcaggatatgtcctgtcaagaatgtctatcacatgccaggagtacttttaggaacagaaaaaatgtctgaaa  
tggtttctcattgaaactcatccaagctttctctaaatgaagcaaaactcctggtcattttcagttagtagtaccttctca  
gtcaaccttcatgacaaaactcagcatctcagaagatttagccatagctgaaattcttccatagactggccct  
gtaatcccagttgcctcagctgttatcctgctttttattcccctctattcccaggctgagcttcttcttctgtcctatga  
gacgttagattccttcgcttggtagccaagtaaacccatccttctccatatacaggaaggccatttttctttacagc  
cctggatgcagactcagctaagaagaccattattcatttttgggaattcttcatctaggatatttcttcttgtttcttct  
cctatctttgagcttttagatcatcaacacccattagctattaccaacttaaatcaggggaactataacctccaaa  
ctcattcagagactccaacatatattgatacaggagacctaagaagagcatgtcttgggggttgaggaaacag  
gcaggtgagaaaacttcagattggaacacagcttcttttcccgtccagcccacttcatcctatctgtttccgga  
acctgtttagatgaatctccttgacttcatgatgtgctgagaaacaaaactcatggctgggtttaaaaagggcc  
atgacaataccaagtgttggggagaatgtgggagaatcagaactctattcacagtcggttggaaatgcacacttgtgc  
agaattctatggagaagagtctggcatttctcaaaatgttaacctggatttaccatagaccagcgatttcattcat  
aggtttatactcaaaagaaatgaagaaatgcatgcaaaaaatgtacatgaaaagcaaaacatcattattca  
taatagtaaatggatggaacaacacaaatgtccatcaacttatgaataaagaaaatgtggtctattcatagaatgg  
aatattattcgaccacaaaaaggaatgatgtactgatccatgcaatgacgtggacaaacctgaagataatactag  
atgaaagaagccagtcacaaaaggacttactgtatgattcagttacgtgaaatgtttagaataggcaaatccatag  
aaacaggaggtagattactggttccagggtctcgagtaaggaagaacgagatacaagtttcttttggaggtagt  
gaaattgttggaaacgagatcatgatggtgatagcacaacttgtgaatataataaaatcattgaattgtacagttg  
aatttggcatataaattatgttaaaaaaggggtccacaaaacaaacagccccactctggttgtcagggag  
atattggattaatggccttggacaacaacctctcctggccacagacattcttcagattacaagatattccagagg  
aaacttggaaatgagtctgaagccaggtgctaaatggaaggaccaccaagaaacgttgtgatcctgacaggtcaa  
gcaacttcttttctgcttaatttttaaatgaaaaattagaaagctgacattcaaaatggcccgtctgtttcaattgctct  
tctcagtgtagcctgttaactcaatgtgttagtctgttttcatgctgctgataaagacataacctgagattaggaagta  
aaagaggtttaattggacttagagttccacgtgattggggaggcctcagaatcacggtaggaggcaaaagttattct  
tacatggtggctgcaagagaaaatgaggaagaagcaaaagaagaaccctaataaaccttggatctcctgag  
acttattaactatcatgagaatagcacaagaagaccggccccatgattcaattacctctacctgggtccctccaac  
aacatgtggaaattctggtagatacaattcaagttgagatttgggtgggaacacagccaaacctatcactcagcaa  
ggcagataactttctactgagcctatgcaacagaaaacctctgggatggttgaaggggacaggaagtgactg  
gtaggatcactgccaagctgagcattcaggagaaggcaatagaatcctattcctatagtagctataagatactg  
aagtacacttctcactatcttggacttagaattagcactatttcttgttatacagaaaaattactaaggaaatt  
cataggatgacaaaaacttccagaactgaaaaacaggaaatgtaagcttttagtctttggattcgaagtatgcct

aaaagacaatgcaaaatccaagaaaagaatgggtggggttttgtttgtttgttttgttttgttttacagctggagtag  
aatacaaagggatggagttgaaacaaatgagaggaaattggaattctaaacttattctcattggcattagaaaggc  
acctacatgtatttcacatgagccggtgactgctgacttgattcttatttttccctatagattaaaaggagtaca  
tggtagaactgtaatcctgtccttgtcataaatttcgtattcataaaggtagtgtagccgcttgtaaactgaa  
gttgagtaactcA AATACTAACCACAGAGGGAGAGGCAGCAAGAGGAGAGGCATAAATTC  
AGGATCTCACCCCTTCATTCCACA GACACACATAGCCTCTCTGCCACCTCTGCTTCCTCTA  
GGAACACAG

–transcription start site:

A – SCCA1 transcription start site according to K Hamada, et al. Molecular cloning of human squamous cell carcinoma antigen 1 gene and characterization of its promoter. Biochimica et Biophysica Acta 2001,1518:124-131

A – SCCA1 transcription start site according to ncbi/ensembl
